# Supplementary material for: Sirtuin-1 sensitive lysine-136 acetylation drives phase separation and pathological aggregation of TDP-43
Source: Springer Nature journal article supplement (doi:10.1038/s41467-022-28822-7), 2022-03-09
Supplement: MOESM1 [file 41467_2022_28822_MOESM1_ESM.pdf › 41467_2022_28822_MOESM1_ESM.pdf]

**Supplementary Table 1.** TDP-43 peptides found by MS to be acetylated. Longer chain lysine modifications like propionylation and butyrylation were not detected.

| Peptide sequence                       | Peptide lysine | TDP-43 residue | Mascot identity score |
|----------------------------------------|----------------|----------------|-----------------------|
| RLVEGILHAPDAGWGNLVYVVNYPK <u>D</u> NKR | K25            | K79            | 27.2                  |
| RKMDETDASSAVKV                         | K2             | K84            | 28.3                  |
| RAVQ <u>K</u> TSDLIVLGLPWKT            | K5             | K121           | 25.0                  |
| KEYFSTFGEVLMVQV <u>K</u> KD            | K17            | K136           | 30.0                  |

**Supplementary Table 2.** List of mutagenesis and cloning primers.

| Primer                        | Sequence                                             |
|-------------------------------|------------------------------------------------------|
| TDP $\Delta$ GRD NotI reverse | ccccgcgccgcctaactcttcttaactgtctattgctattg            |
| TDP-43 6His BamHI reverse     | cagcgccgcgcgatccttaattggtgatggtgatgcattccccagccagaag |
| TDP-43 6His NheI forward      | gctagccatcatcaccatcaccatattgtctgaatatattc            |
| TDP-43 BamHI forward          | ggggggatccgatgtctgaatatattcgggtaacc                  |
| TDP-43 Bsp120 forward         | ggggggggcccacatgtctgaatatattcgggtaaccg               |
| TDP-43 HindIII reverse        | ccccaagcttctacattccccagccagaag                       |
| TDP43 K121Q forward           | ccgaacaggacctgcaagagatttttagtac                      |
| TDP43 K121Q reverse           | gtactaaaatactcttcaggtcctgttcgg                       |
| TDP43 K121R forward           | ccgaacaggacctgagagagatttttagtac                      |
| TDP43 K121R reverse           | gtactaaaatactcttcaggtcctgttcgg                       |
| TDP43 K136Q forward           | ggtgcaggtccagaaagatcttaagactgg                       |
| TDP43 K136Q reverse           | ccagtcttaagatctttctggacctgcacc                       |
| TDP43 K136R forward           | ggtgcaggtcaggaaagatcttaagactgg                       |
| TDP43 K136R reverse           | ccagtcttaagatctttctgacctgcacc                        |
| TDP-43 K136TAG forward        | cttatggtgcaggtctagaaagatcttaagact                    |
| TDP-43 K136TAG reverse        | agtcttaagatctttctagacctgcaccataag                    |
| TDP43 K145Q forward           | gactggtcattcacaggggtttggctttg                        |
| TDP43 K145Q reverse           | caaagccaaacccctgtgaatgaccagtc                        |
| TDP43 K145R forward           | gactggtcattcaaggggtttggctttg                         |
| TDP43 K145R reverse           | caaagccaaacccctgtgaatgaccagtc                        |
| TDP-43 K79Q forward           | gtcaactatccacaagataacaaaagaaaaatg                    |
| TDP-43 K79Q reverse           | catttttctttgttatcttctggatagttgac                     |
| TDP-43 K79R forward           | gtcaactatccaaagagataacaaaagaaaaatg                   |
| TDP-43 K79R reverse           | catttttctttgttatcttctggatagttgac                     |
| TDP43 K84Q forward            | gataacaaaagacaaatggatgagacag                         |
| TDP43 K84Q reverse            | ctgtctcatccattgtctttgttatc                           |
| TDP-43 K84R forward           | ccaaaagataacaaaagaagaatggatgagacag                   |
| TDP-43 K84R reverse           | ctgtctcatccattcttctttgttatctttgg                     |
| TDP-43 K84TAG forward         | ccaaaagataacaaaagatagatggatgagacagat                 |
| TDP-43 K84TAG reverse         | atctgtctcatcatctatctttgttatctttgg                    |
| TDP-43 NheI forward           | ctactctagagctagcatgtctgaatatatt                      |
| TDP-43 NotI reverse           | ccccgcgccgcctacattccccagccagaag                      |
| TDP-43 SalI forward           | ggggtcgacgatgtctgaatatattcgggtaaccg                  |

Supplementary figure 1

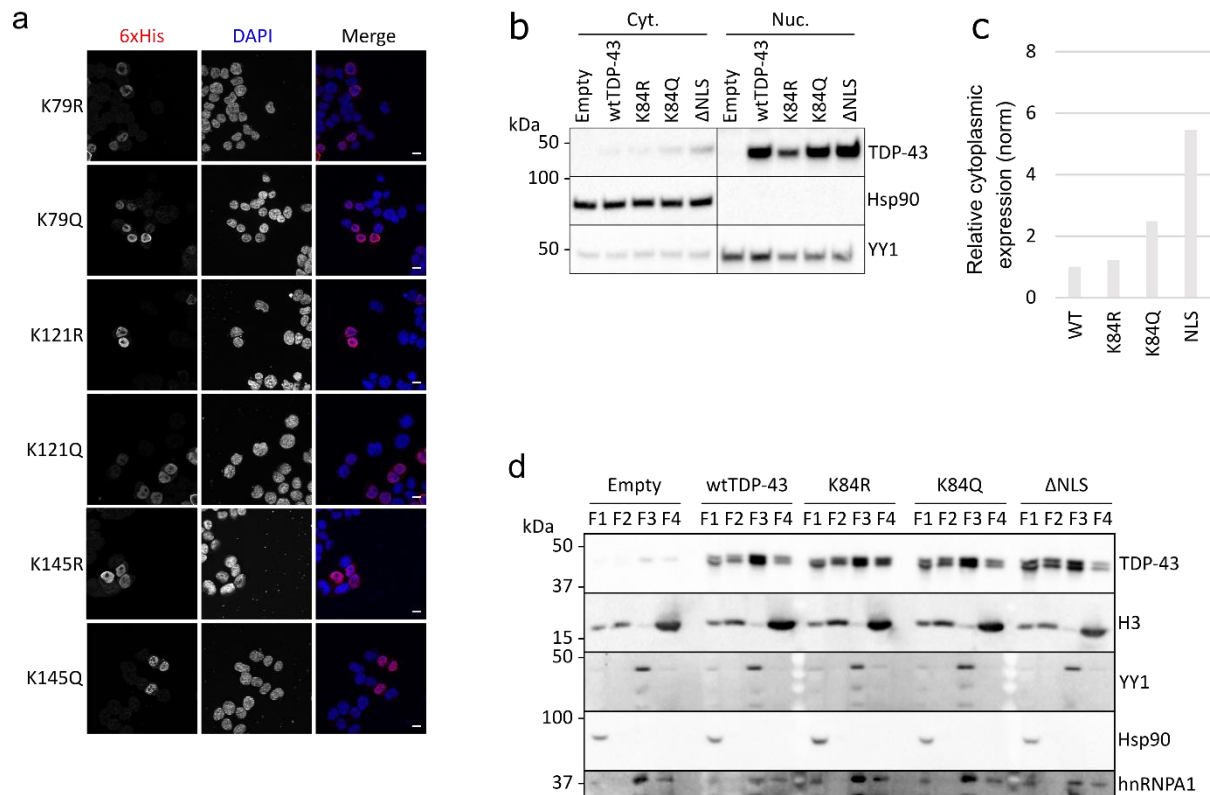

**Supplementary Figure 1.** Nuclear cytoplasmic distribution of TDP-43 is disturbed in K84Q mutants. **a** Immunostaining of HEK293E cells previously transfected with 6xHis tagged non acetyl-mimics (K79R, K121R and K145R) or acetyl-mimics (K79Q, K121Q and K145Q). Scale bar represents 10  $\mu$ m. N = 3 biologically independent experiments. **b** Cytoplasmic and nuclear fractions from HEK293E cells transfected with 6xHis tagged wt, K84R, K84Q or Flag tagged  $\Delta$ NLS TDP-43. These fractions were analyzed by Western blot. 6 and 3,5 $\mu$ g of protein from the cytoplasmic and nuclear fraction was loaded, respectively. N = 2 biologically independent experiments. Hsp90 and YY1 were used as cytoplasmic and nuclear markers respectively. Source data are provided as a Source Data file. **c** Quantification of the proportion of TDP-43 in the cytoplasm normalized to wtTDP-43. N = 2 biologically independent experiments. \* =  $p < 0.05$ , \*\* =  $p < 0.01$ . Source data are provided as a Source Data file. **d** Subcellular protein fractionation of different TDP-43 constructs. Cells were transfected with 6xHis tagged TDP-43 and proteins were fractionated in four fractions using a subcellular protein fractionation kit for cultured cells (Thermo Fisher) according to manufacturer's instructions: F1 (cytoplasmic soluble), F2 (membrane bound), F3 (nuclear soluble) and F4

(histone bound). Hsp90, YY1 and H3 were used as markers for the cytoplasmic, nuclear soluble and histone bound fractions, respectively. N = 2 biologically independent experiments. Source data are provided as a Source Data file.

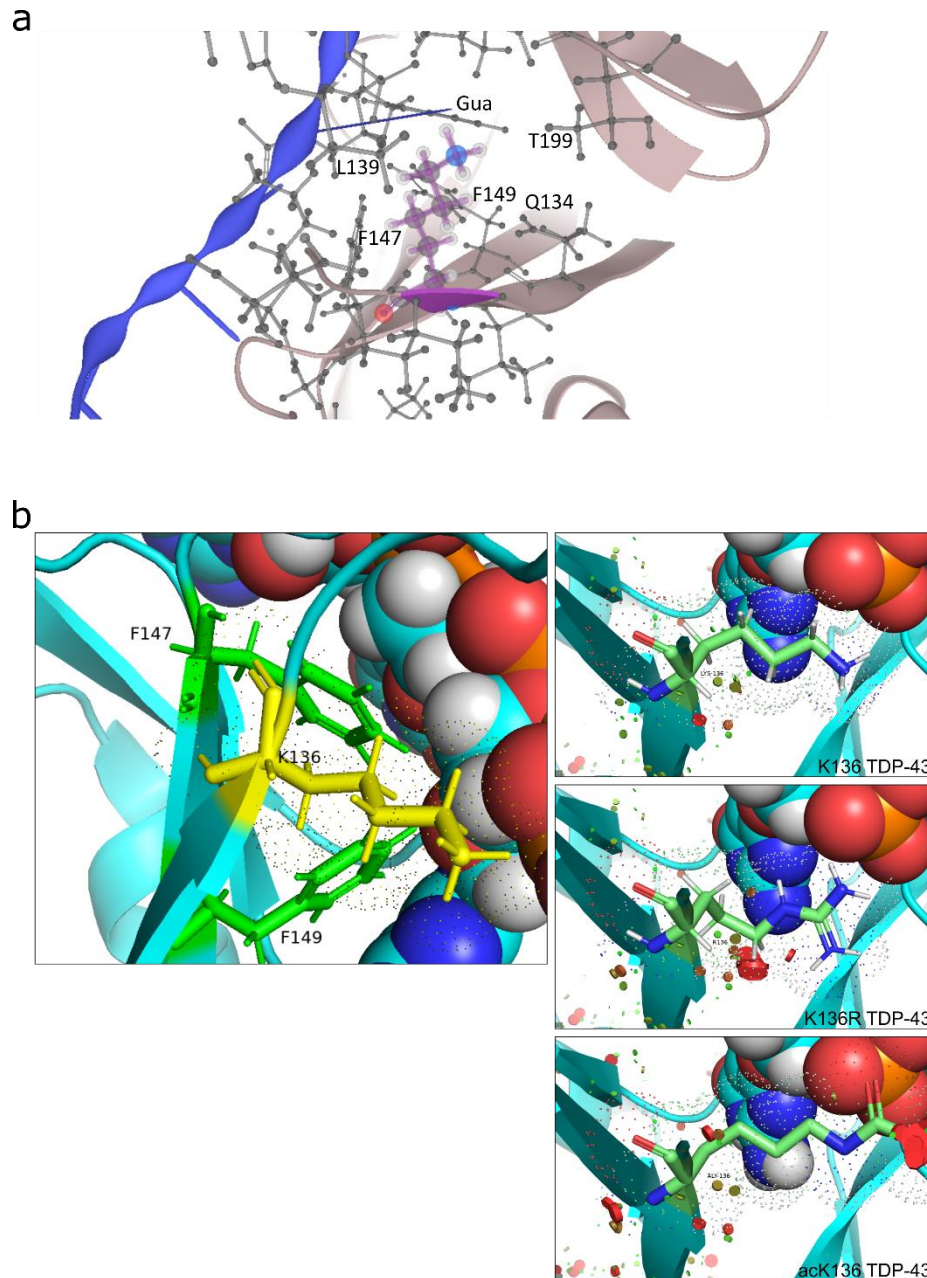

**Supplementary Figure 2.** Protein structures of TDP-43 RRM1 RNA binding pocket. **a** Structure of TDP-43 RRM1 in contact with RNA (PDB: 4BS2) with highlighted K136 atoms. **b** Close-up view of TDP-43 with

different 136 amino acid substitutions. Green circles represent points of contact between TDP-43 amino acids. Red circles represent clashes between residue 136 and other objects.

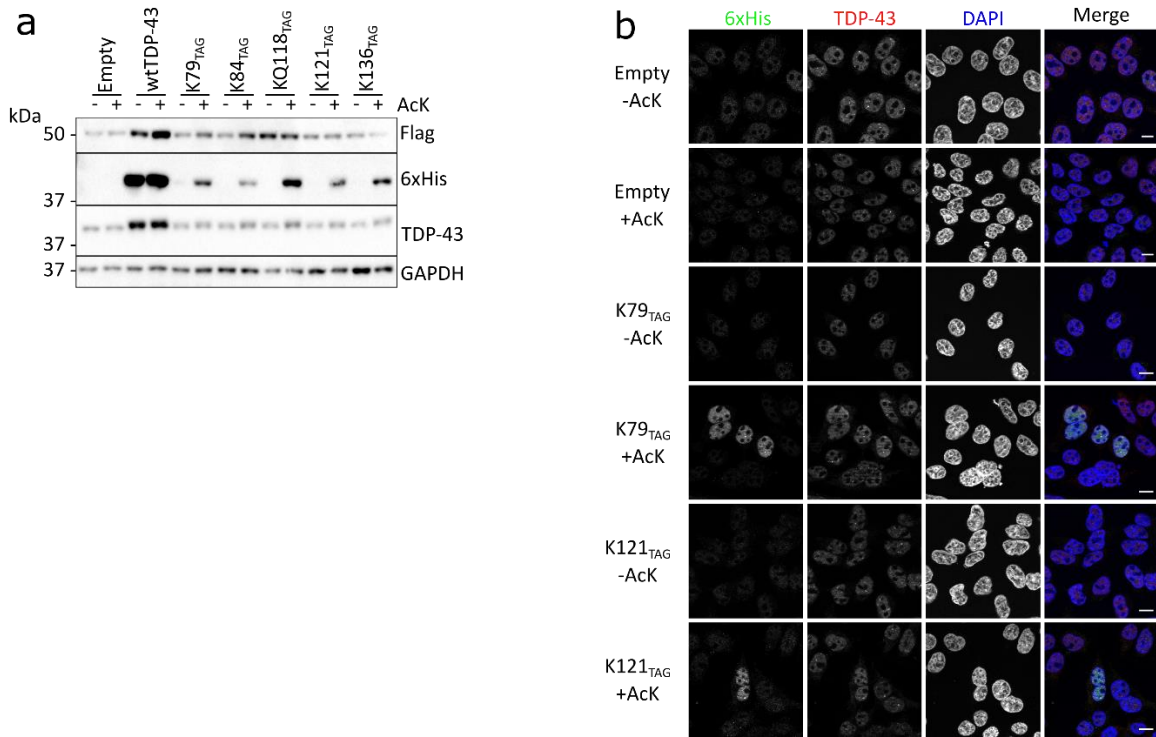

**Supplementary Figure 3.** Amber suppression of TDP-43 at K79 and K121 does not impact its subcellular distribution. **a** Western blot of HEK293E cells transfected with E451 containing a Flag-tagged acKRS, RNA<sub>TAG</sub> and different C-terminal 6xHis-tagged TDP-43 constructs. Cells were lysed after 24h in the presence of 5mM acK in the media. N = 3 biological replicates. Source data are provided as a Source Data file. **b** Double immunostaining of HEK293E cells transfected with Flag-tagged acKRS, RNA<sub>TAG</sub> and different C-terminal 6xHis-tagged TDP-43 constructs. Cells were fixed after 24h in the presence of 5mM acK in the media. Scale bar represents 10 μm. N = 3 biological replicates. Source data are provided as a Source Data file.

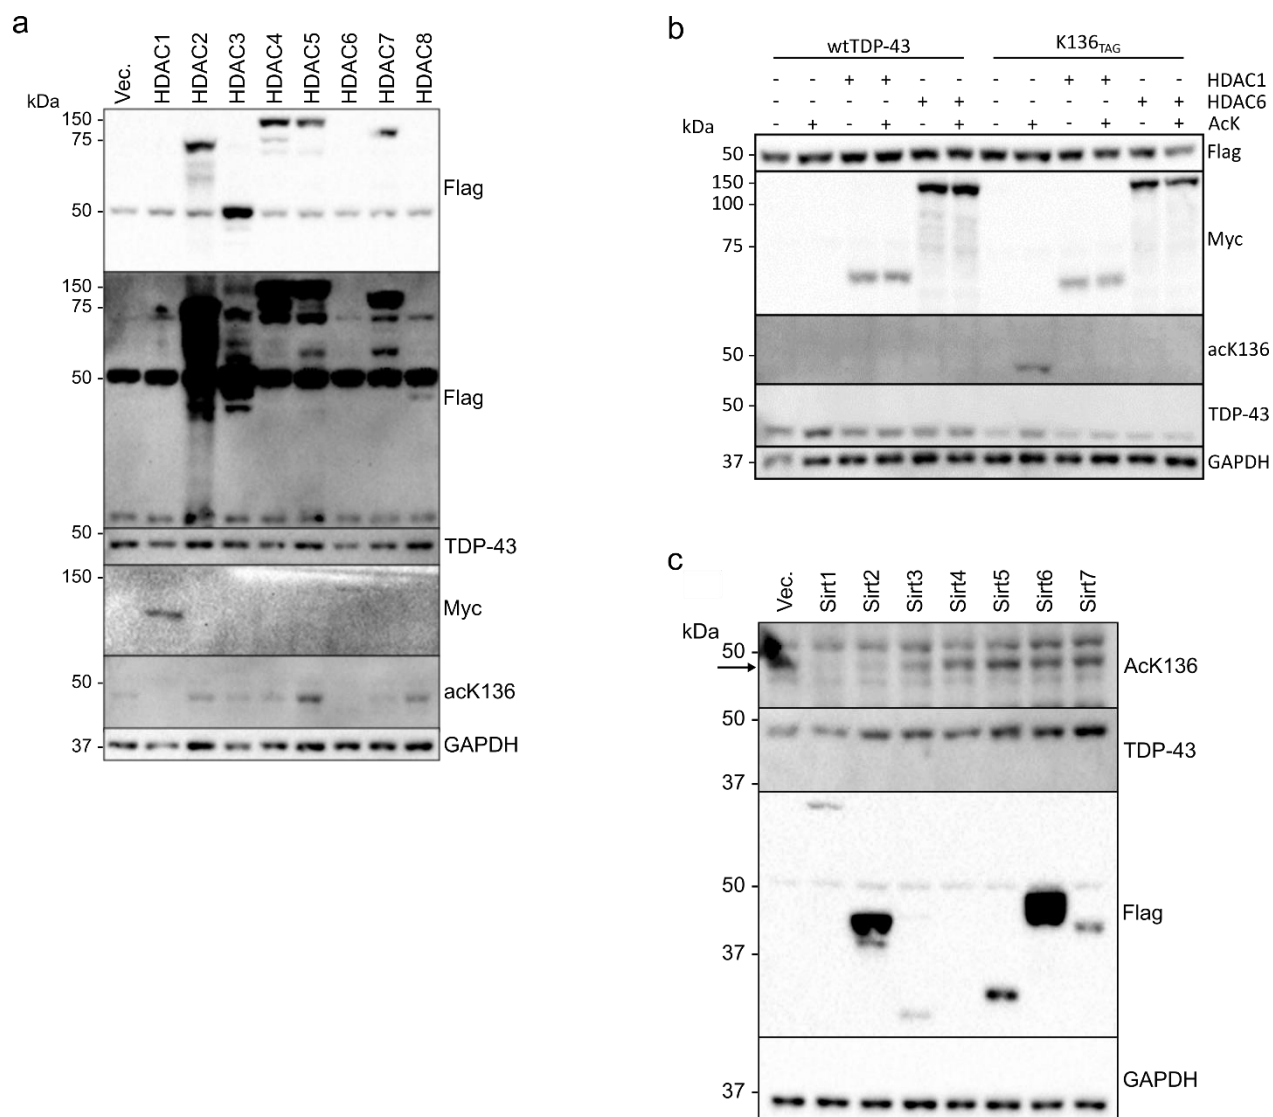

**Supplementary Figure 4.** HDAC and Sirtuin effect on K136 acetylation of TDP-43. **a** Stably amber suppressed sh<sup>TDP-43</sup>-HEK293E cells were cotransfected with HDAC1-8 constructs together with K136<sub>TAG</sub> TDP-43. Cells were lysed after 24h in the presence of 5mM acK. Protein levels were assessed via Western blot. HDAC1 and 6 were myc-tagged, while HDAC2, 3, 4, 5, 7 and 8 were Flag tagged. N = 2. Source data are provided as a Source Data file. **b** Stably amber suppressed sh<sup>TDP-43</sup>-HEK293E cells were cotransfected with HDAC1 or HDAC6 constructs together with K136<sub>TAG</sub> TDP-43 or wtTDP-43. Cells were lysed after 24h in the presence of 5mM acK. Protein levels were assessed via Western blot. N = 2. Source data are provided as a Source Data file. **c** Stably amber suppressed sh<sup>TDP-43</sup>-HEK293E cells were cotransfected with sirtuin

constructs together with K136<sub>TAG</sub> TDP-43. Cells were lysed after 24h in the presence of 5mM acK. Protein levels were assessed via Western blot. N = 3. Source data are provided as a Source Data file.

**Supplementary video 1 and 2.** Live imaging of HEK293E cells 48 hours after transfection with [K136Q]TDP-43-EGFP. Cells were kept at 37°C and 5% CO<sub>2</sub> during the experiment. Imaging took place every 5min for 4 hours.

**Supplementary video 3.** Live imaging of HEK293E cells 48h after transfection with [K136Q]TDP-43-EGFP. Cells were kept at 37°C and 5% CO<sub>2</sub> during the experiment. Imaging took place every 2min for 1 hour.
